# Supplementary material
Source: MDPI journal article supplement (https://www.mdpi.com/2813-4168/2/1/5)
Supplement: s1 [file s1]

Article

# Emission Characteristics and Potential Exposure Assessment of Aerosols and Ultrafine Particles at Two French Airports

Sébastien Artous<sup>1\*</sup>, Eric Zimmermann<sup>1</sup>, Cécile Philippot<sup>1</sup>, Sébastien Jacquinot<sup>1</sup>, Dominique Locatelli<sup>1</sup>, Adeline Tarrantini<sup>2</sup>, Carey Suehs<sup>3</sup>, Léa Touri<sup>4</sup>, Simon Clavaguera<sup>1</sup>

<sup>1</sup> University Grenoble Alpes, CEA, Liten, DTNM, 38000 Grenoble, France;

<sup>2</sup> University Grenoble Alpes, CEA, Nanosafety Platform (PNS), Laboratory of Medical Biology (LBM), 38000 Grenoble, France;

<sup>3</sup> Departments of Medical Information and Respiratory Diseases, University Montpellier, CHU Montpellier, 34295 Montpellier, France;

<sup>4</sup> Air France Aéronautic, Occupational Health department, 95747 Roissy Charles de Gaulle CEDEX, France;

\* Correspondence: sebastien.artous@cea.fr

## Supplementary Material

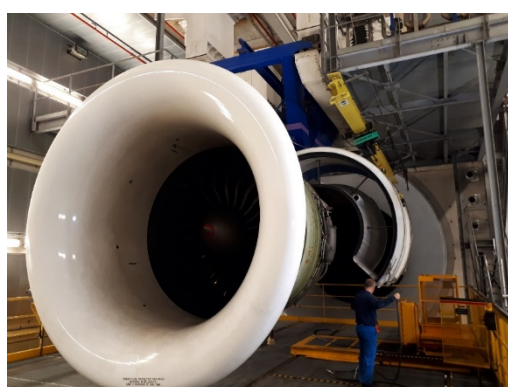

(a)

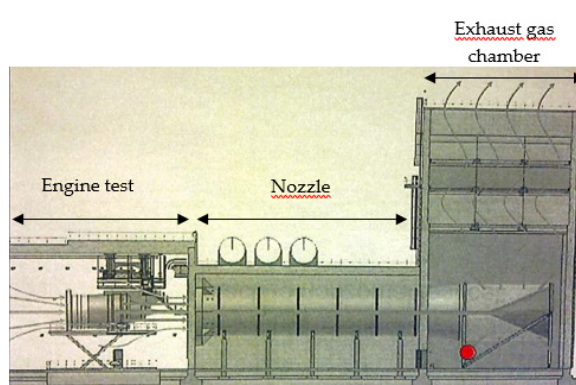

(b)

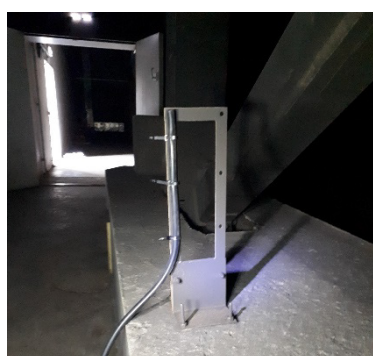

(c)

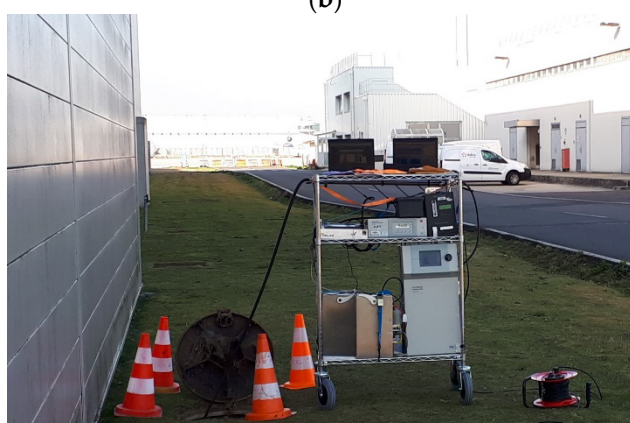

(d)

**Figure S1.** Aircraft engine sampling location with: (a) the engine test area, (b) the schematic view of the Zephyr Air-France test bench with the location of the aerosol sampling point in red, (c) the aerosol sampling probe inside the exhaust chamber and finally (d) the trolley mounted with the aerosol devices.

**Table S1.** Basic meteorological data, temperature (°C), pressure (hPA), humidity (%), rain (mm en 1 hour), wind speed (10m meters high) and wind direction (on 360°) – recorded at the Roissy meteorological station, from <https://meteo.data.gouv.fr>, (accessed on 19 February 2024, Latitude: 49°00'55" Nord, Longitude: 2°32'04" Est), during the characterisation of the exhaust engines (GE90, CFM56-5B, Pushback tractor 256, Generator set, Gasoline car, Diesel van) and at the Medium-haul aircraft area.

| Sources of emission                           | Temperature<br>(°C) | Pressure<br>(hPA) | Humidity<br>(%) | rain (mm<br>en 1 hour) | wind speed, 10m<br>meters high<br>(m/s) | wind<br>direction<br>(on 360°) |
|-----------------------------------------------|---------------------|-------------------|-----------------|------------------------|-----------------------------------------|--------------------------------|
| Aircraft engine GE90<br>(long haul)           | 9                   | 1008              | 71              | 0                      | NA*                                     | NA*                            |
| Aircraft engine<br>CFM56-5B (medium-<br>haul) | 17                  | 1005              | 73              | 0                      | NA*                                     | NA*                            |
| Pushback tractor 256<br>(Old generation)      | 22                  | 1000              | 56              | 0                      | NA*                                     | NA*                            |
| Pushback tractor 270<br>(New generation)      |                     |                   |                 |                        |                                         |                                |
| Generator set                                 | 24                  | 997               | 45              | 0                      | NA*                                     | NA*                            |
| Gasoline car                                  | 24                  | 998               | 46              | 0                      | NA*                                     | NA*                            |
| Diesel van                                    |                     |                   |                 |                        |                                         |                                |
| Medium-haul<br>aircraft area                  | 24                  | 996               | 49              | 0                      | 7                                       | 170                            |

\* The wind data is not applicable as the measurement was taken in the exhaust cone of the engine.

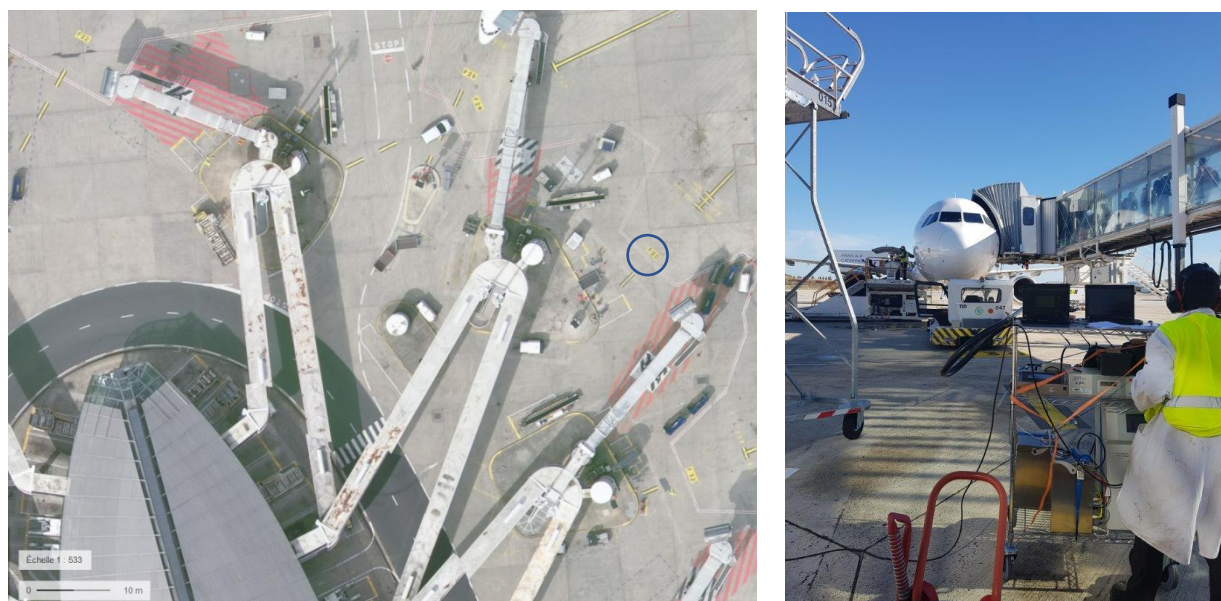

**Figure S2.** Measurement location at the medium-haul area.

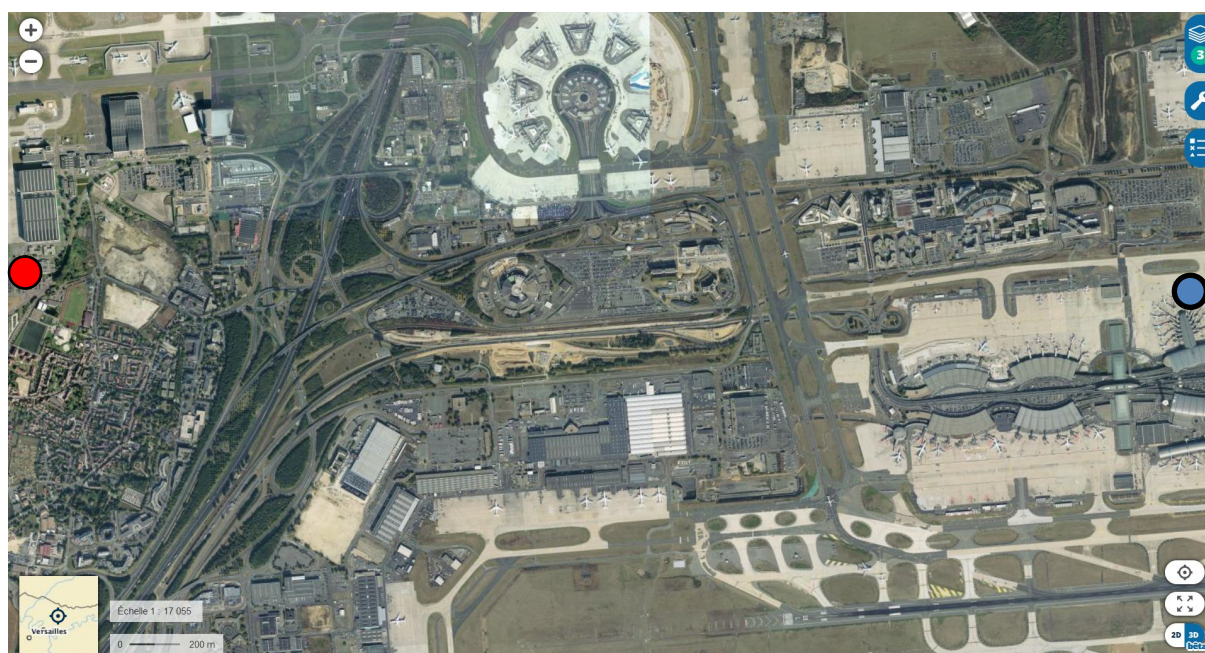

**Figure S3.** Positioning of ambient measurements (red circle) and measurements at the medium haul area (blue circle) at Paris Charles de Gaulle airports.

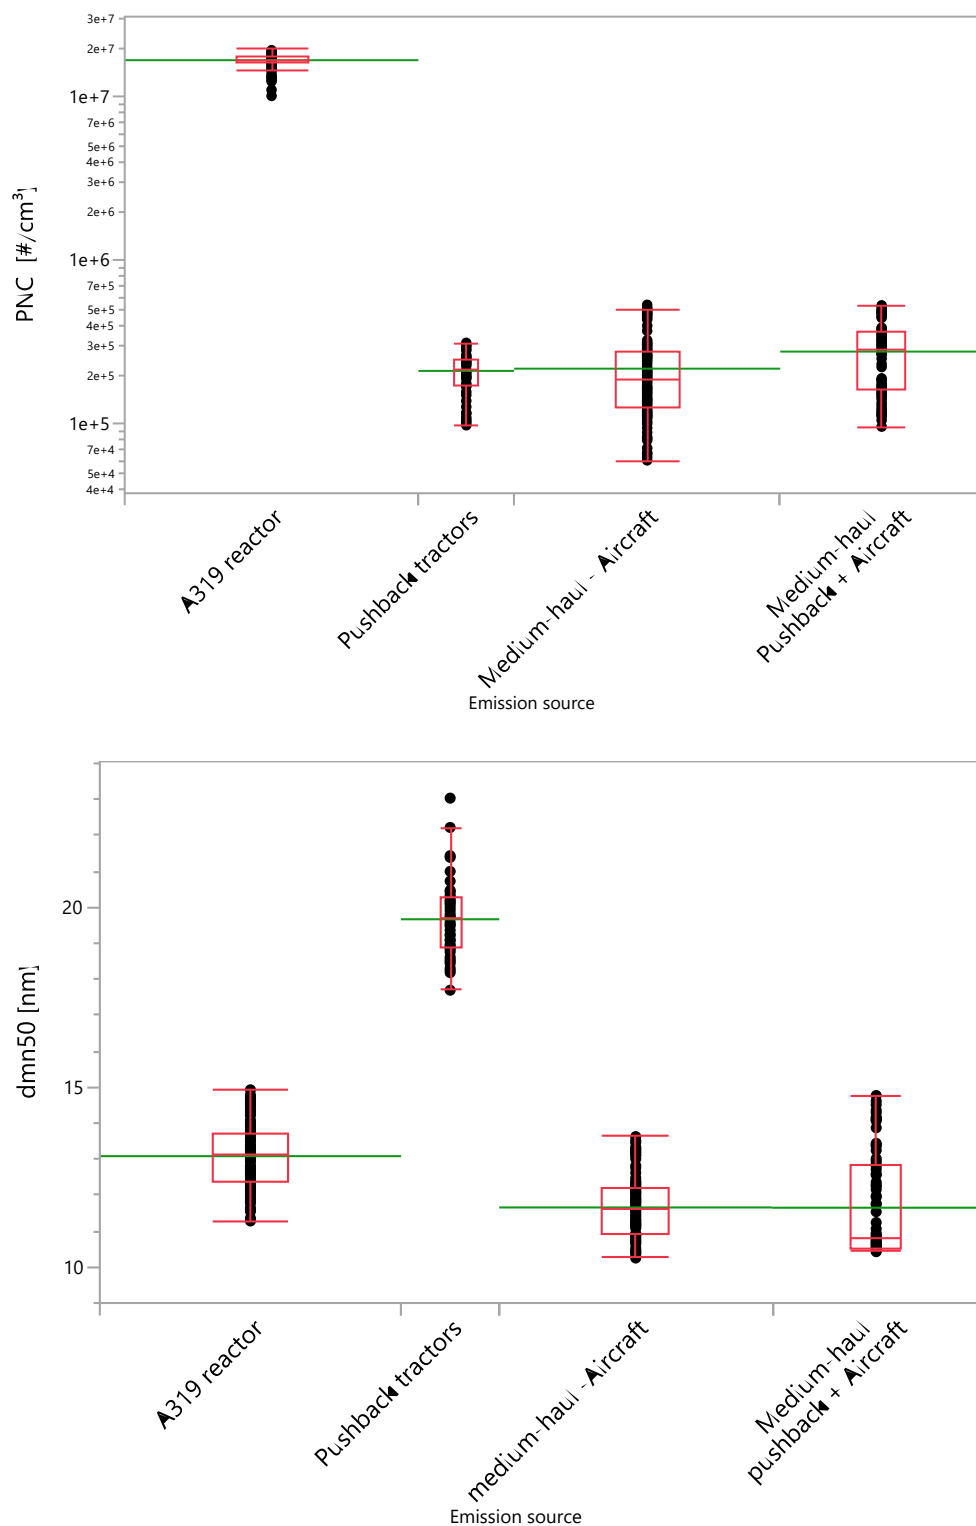

**Figure S4.** Box plots of particle number concentration (PNC) and the median particle size (dmn50) for the motor exhausts studied in 2012 at Paris-CDG and Marseille airport.



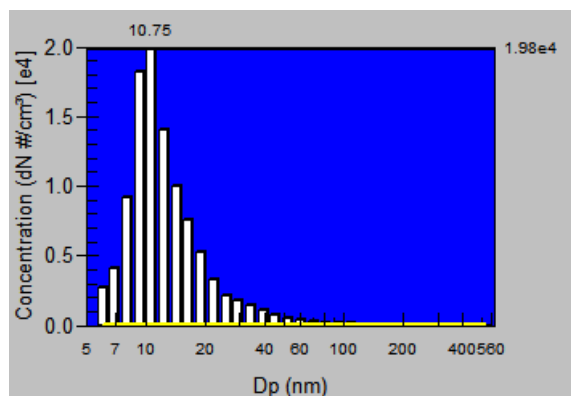

(a) 11 h 29 min ambient on apron

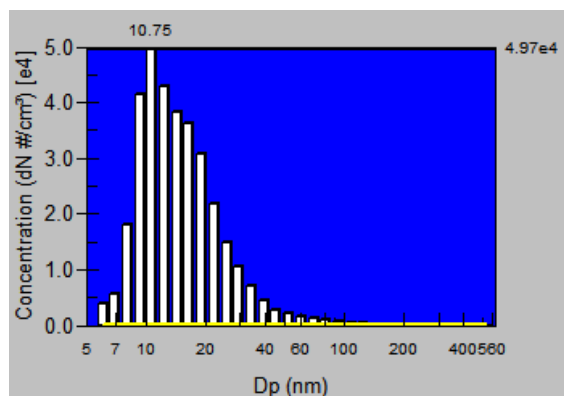

(b) 11 h 10 min airplane taxi

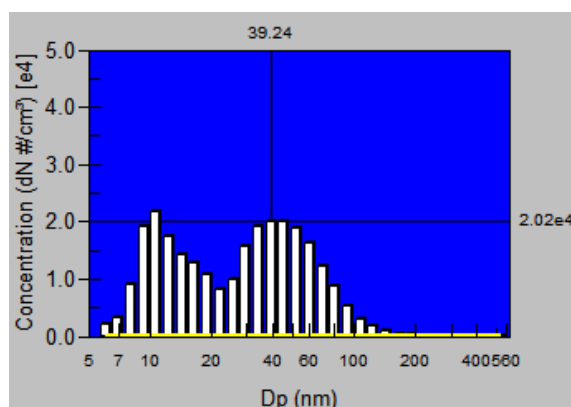

(c) 11 h 13 min vehicle

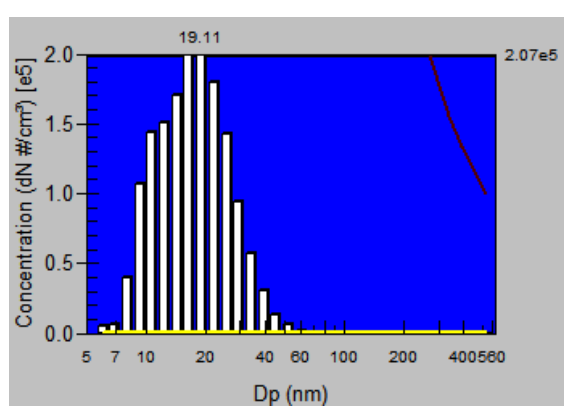

(d) 12 h 03 min reactor emission at start up

**Figure S5.** Discrimination of type of emission based on PSDs recorded by FMPS with (a) PSD on the apron, (b) for air plane taxiing, (c) vehicle passing and (d) when reactor start up

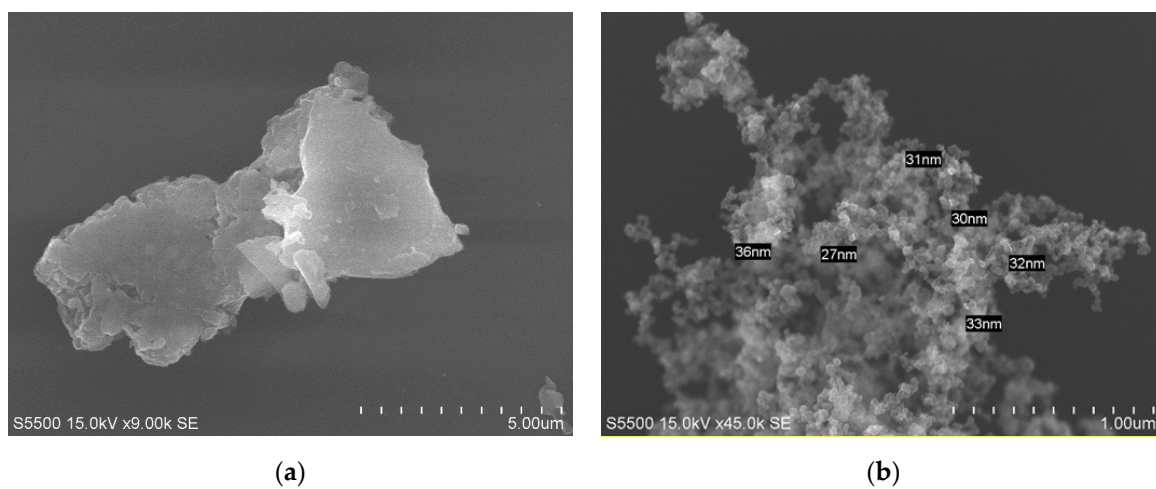

**Figure S6.** SEM pictures of atmospheric particles collected by Sioutas® on the apron at medium-haul area: (a) micrometric particles observed at a magnification of 9k, and (b) aggregate of nanoparticles observed at a magnification of 45k.
